# Supplementary material
Source: PubMed Central journal article supplement (PMC6420048)

Figure 0

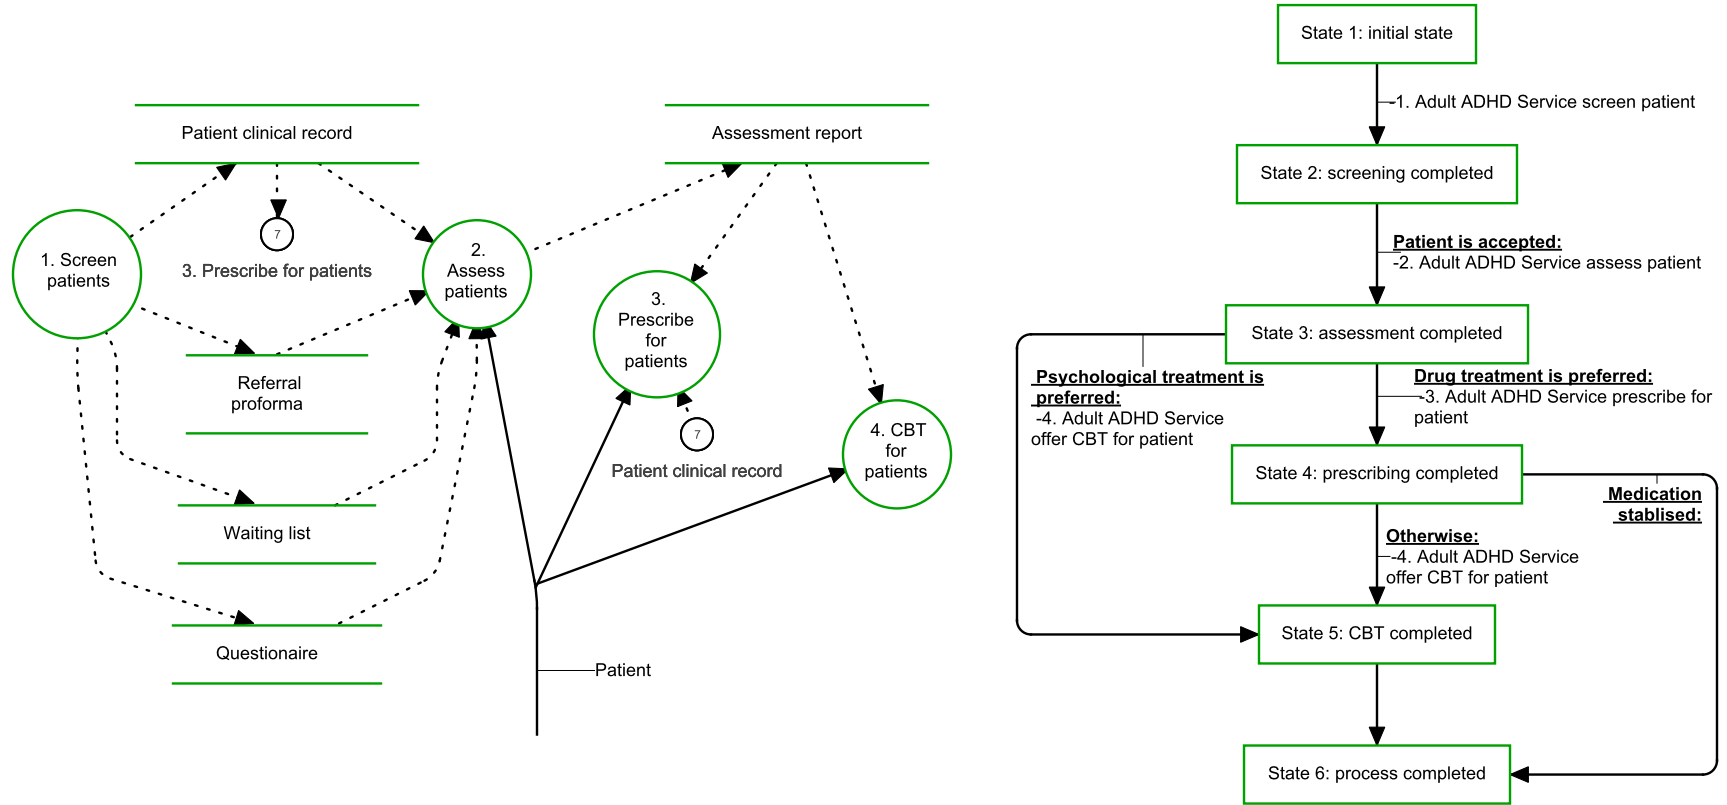

1  
2  
3  
4  
5  
6  
7  
8  
9  
10  
11  
12  
13  
14  
15  
16  
17  
18  
19  
20  
21  
22  
23  
24  
25  
26  
27  
28  
29  
30  
31

Figure 1

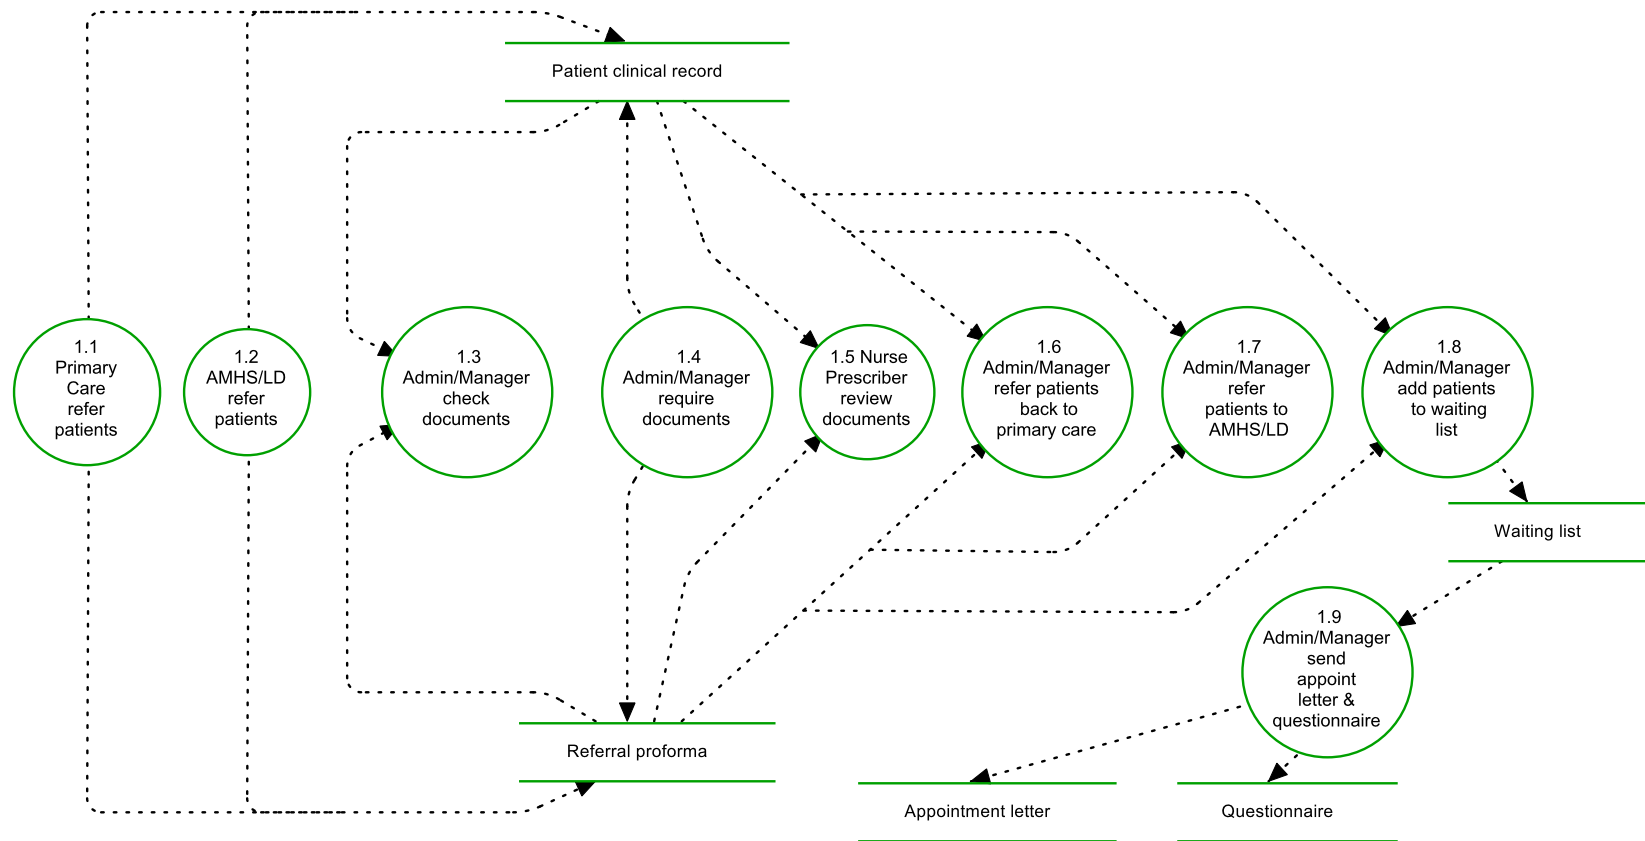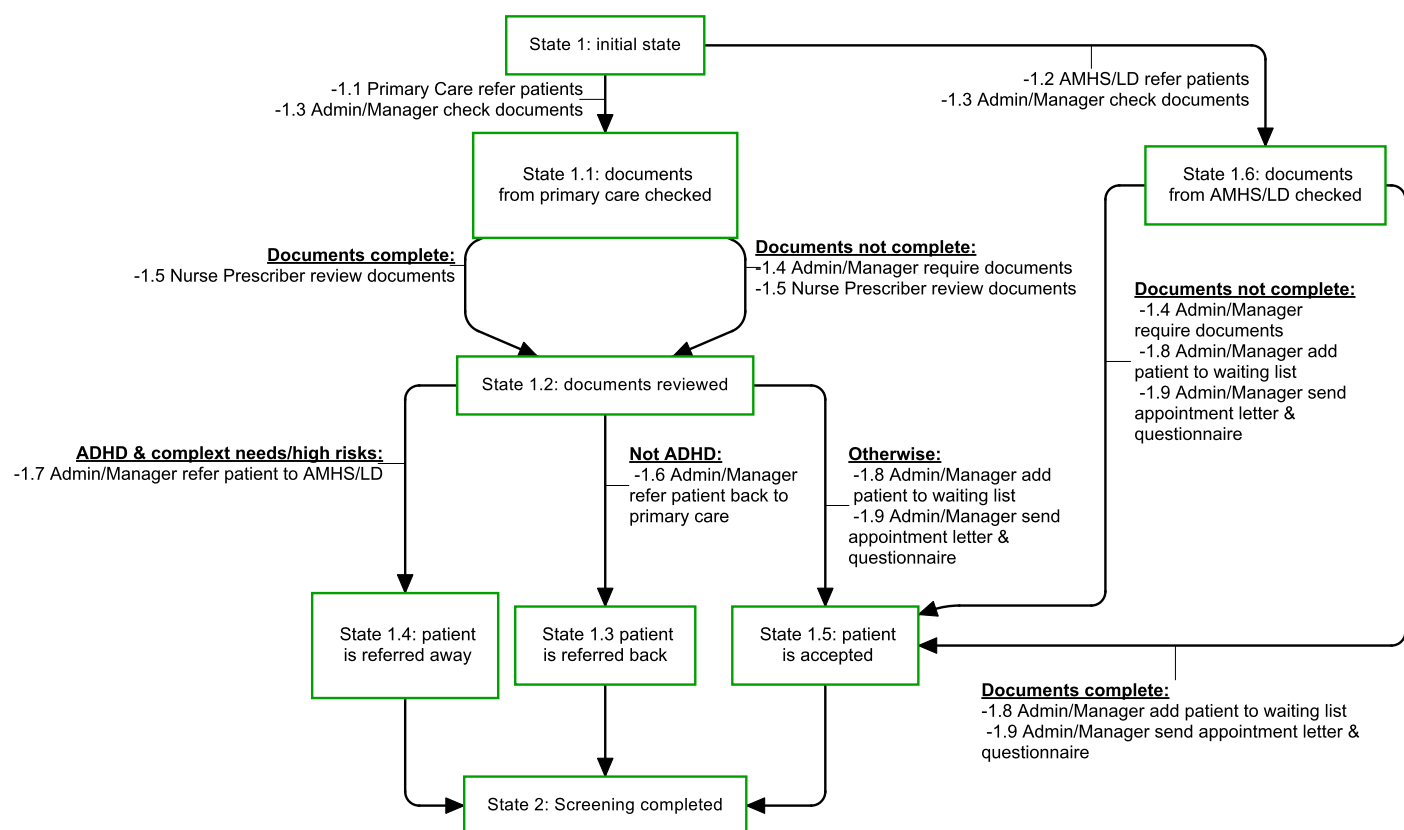

Figure 2

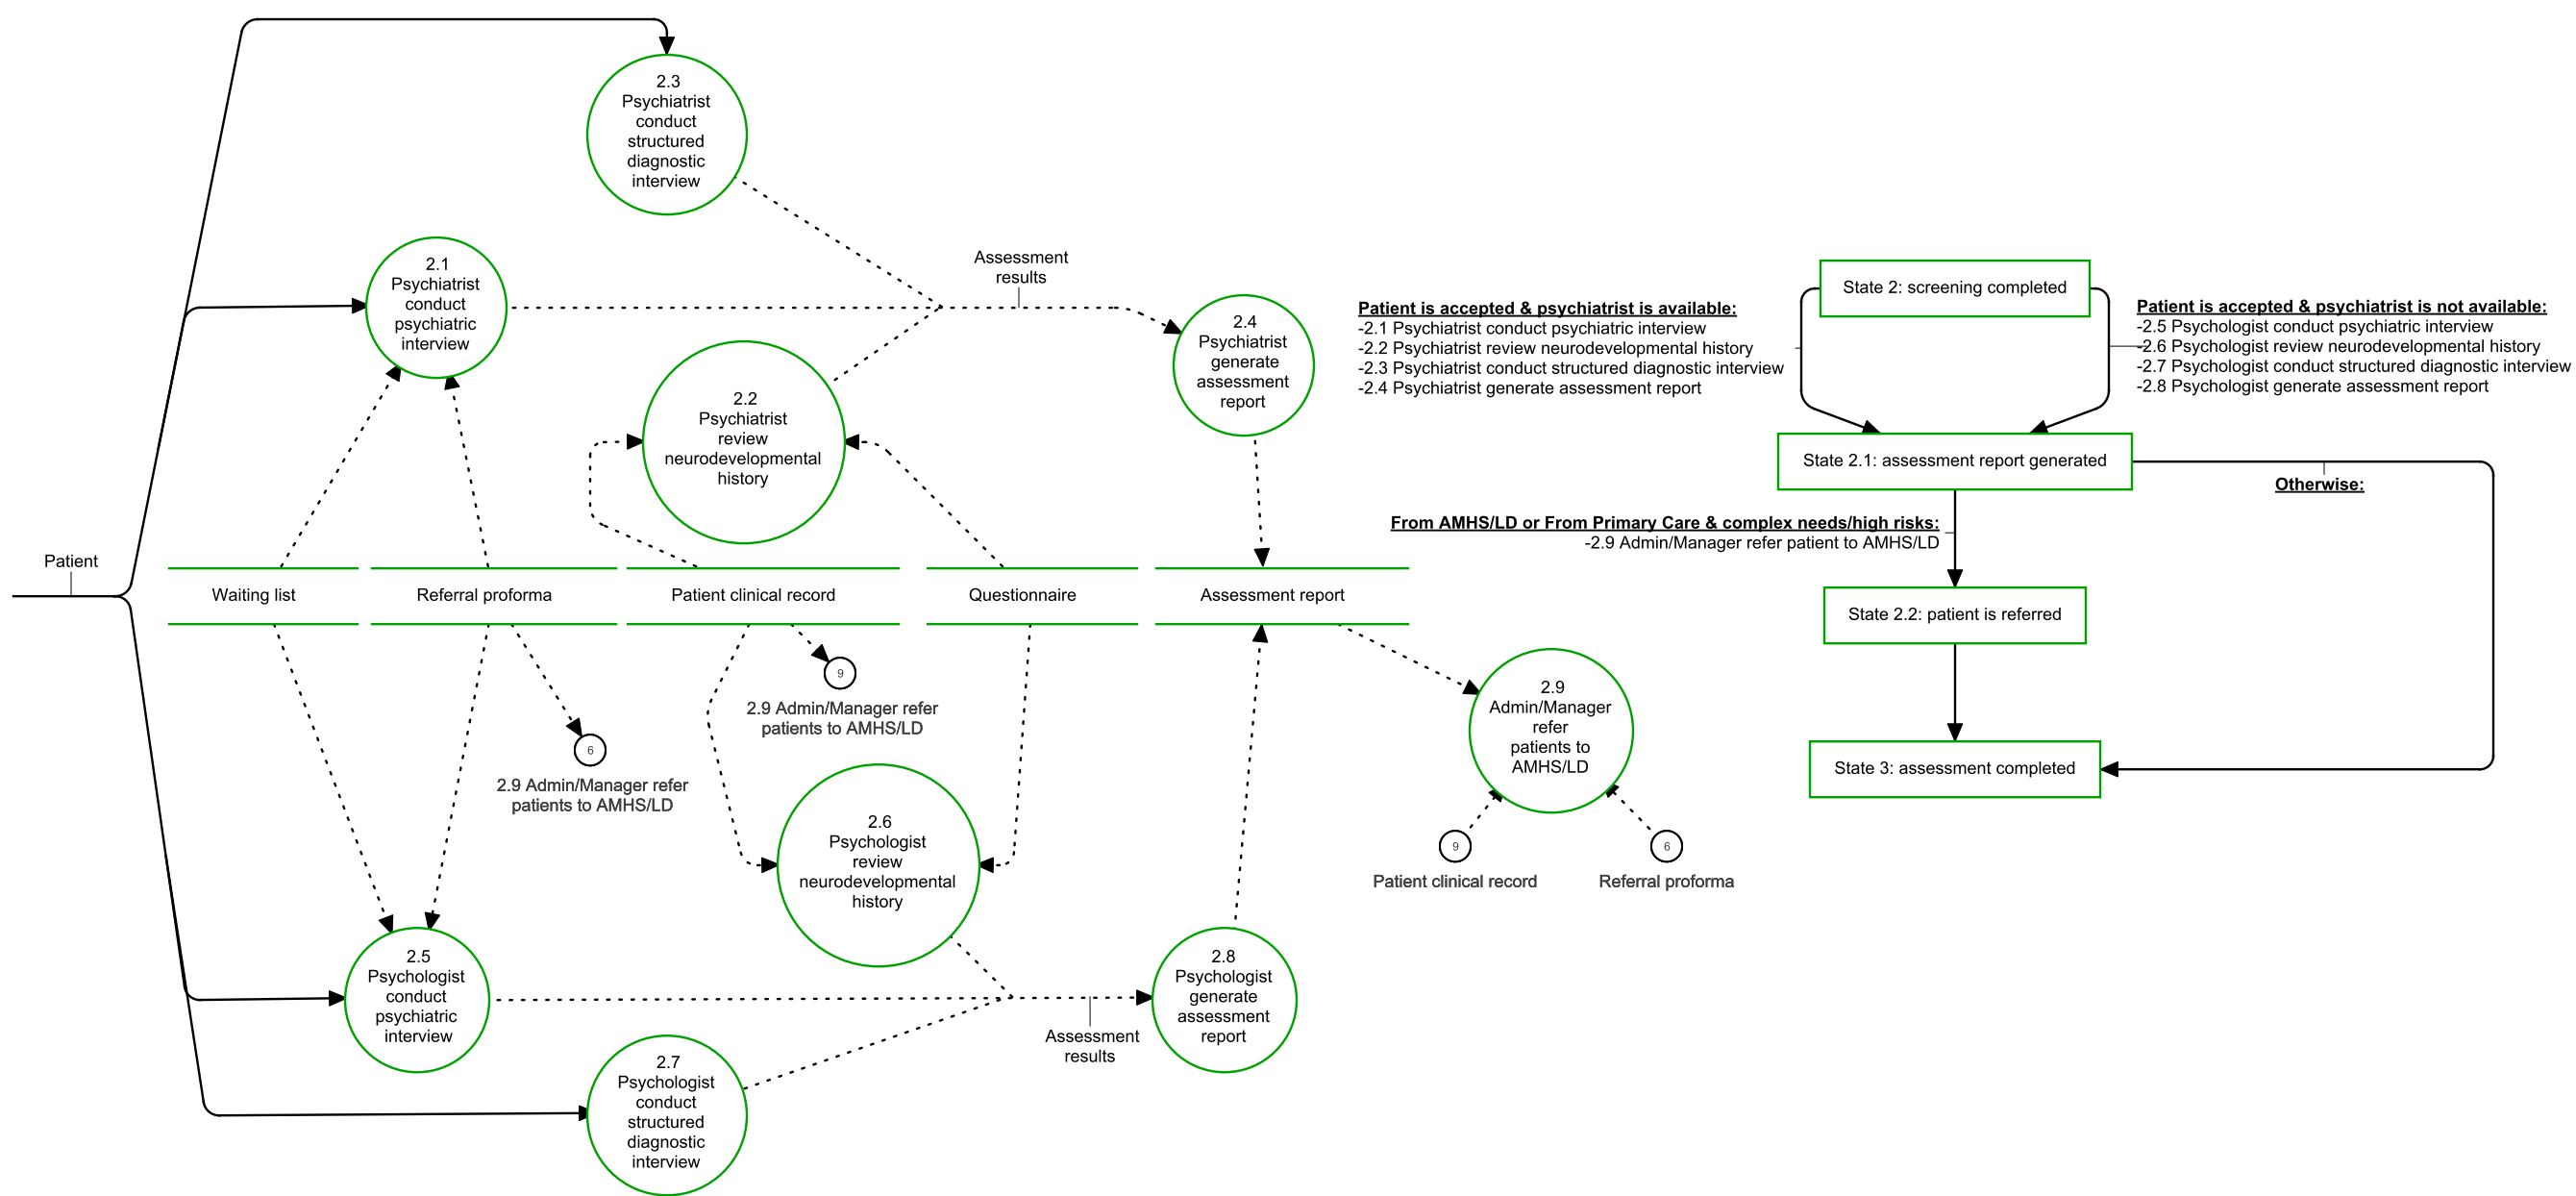

Figure 3

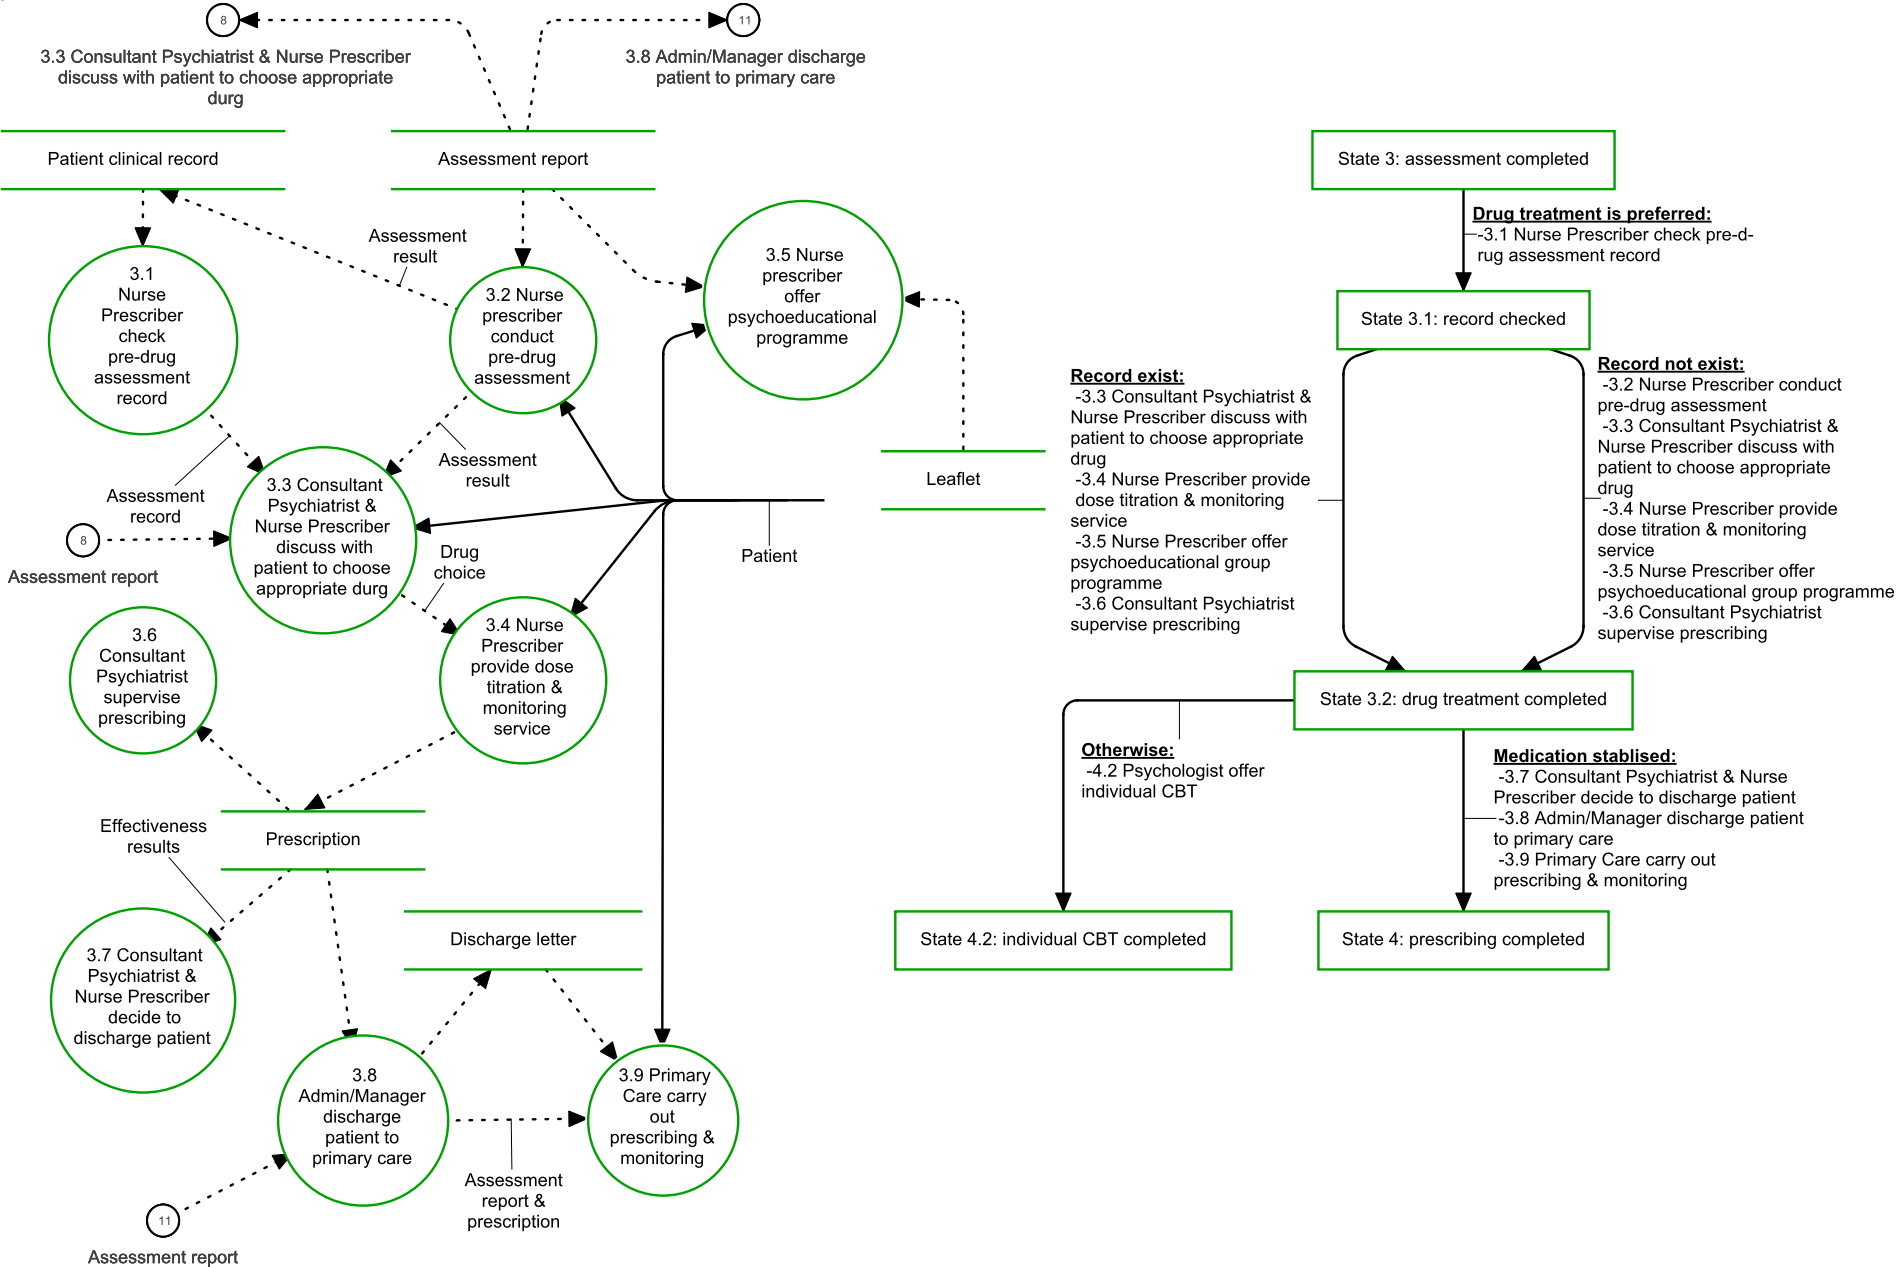

1  
2  
3  
4  
5  
6  
7  
8  
9  
10  
11  
12  
13  
14  
15  
16  
17  
18  
19  
20  
21  
22  
23  
24  
25  
26  
27  
28  
29  
30  
31  
32  
33  
34  
35  
36  
37  
38  
39  
40  
41  
42  
43

Figure 4

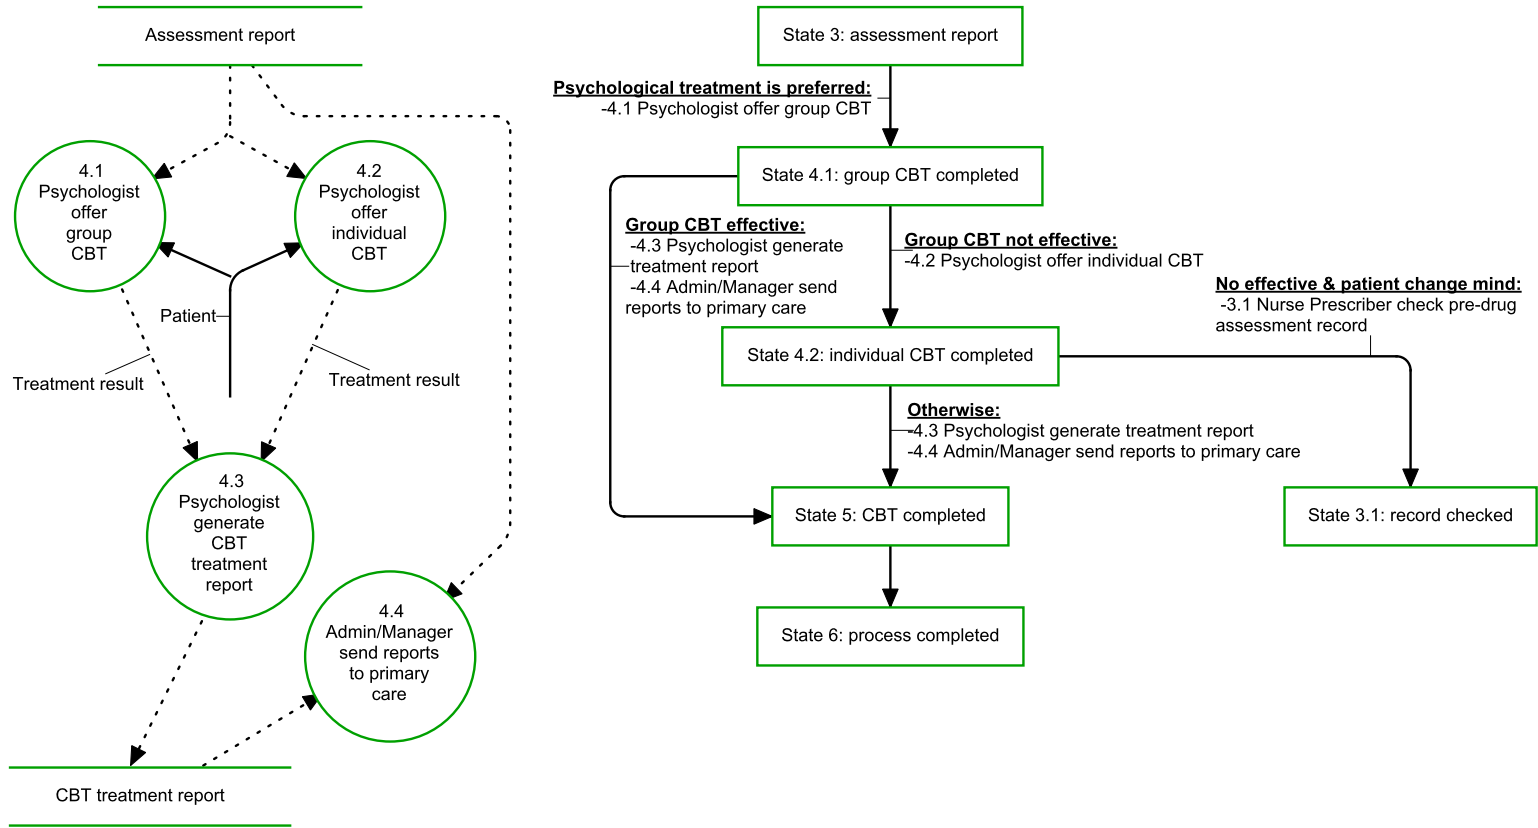

Supplement: NIHMS78728-supplement-Appendix.pdf [file NIHMS78728-supplement-Appendix.pdf]
